# Supplementary material for: Synthesis and Structural Studies of Complexes of Bis(pentafluorophenyl)mercury with Di(phosphane oxide) Ligands
Source: MDPI journal article supplement (doi:10.3390/cryst13030530), 2023-03-20

---

The following ALERTS were generated. Each ALERT has the format

**test-name\_ALERT\_alert-type\_alert-level.**

Click on the hyperlinks for more details of the test.

---

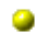

### Alert level C

|                   |                                             |                                           |       |        |
|-------------------|---------------------------------------------|-------------------------------------------|-------|--------|
| PLAT029_ALERT_3_C | _diffn_measured_fraction_theta_full         | value Low                                 | 0.978 | Why?   |
| PLAT220_ALERT_2_C | NonSolvent                                  | Resd 1 C Ueq(max)/Ueq(min) Range          | 3.5   | Ratio  |
| PLAT242_ALERT_2_C | Low                                         | 'MainMol' Ueq as Compared to Neighbors of | C5    | Check  |
| PLAT906_ALERT_3_C | Large K Value in the Analysis of Variance   | .....                                     | 2.458 | Check  |
| PLAT911_ALERT_3_C | Missing FCF Refl Between Thmin & STh/L=     | 0.600                                     | 113   | Report |
| PLAT913_ALERT_3_C | Missing # of Very Strong Reflections in FCF | ....                                      | 57    | Note   |

---

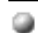

### Alert level G

|                   |                                                  |                     |        |        |
|-------------------|--------------------------------------------------|---------------------|--------|--------|
| PLAT002_ALERT_2_G | Number of Distance or Angle Restraints on AtSite |                     | 14     | Note   |
| PLAT176_ALERT_4_G | The CIF-Embedded .res File Contains SADI Records |                     | 9      | Report |
| PLAT187_ALERT_4_G | The CIF-Embedded .res File Contains RIGU Records |                     | 6      | Report |
| PLAT191_ALERT_3_G | A Non-default SADI Restraint Value has been used |                     | 0.0400 | Report |
| PLAT191_ALERT_3_G | A Non-default SADI Restraint Value has been used |                     | 0.0400 | Report |
| PLAT191_ALERT_3_G | A Non-default SADI Restraint Value has been used |                     | 0.0400 | Report |
| PLAT230_ALERT_2_G | Hirshfeld Test Diff for                          | N3 --C11            | 9.1    | s.u.   |
| PLAT230_ALERT_2_G | Hirshfeld Test Diff for                          | N3 --C11A           | 7.3    | s.u.   |
| PLAT300_ALERT_4_G | Atom Site Occupancy of C9                        | Constrained at      | 0.58   | Check  |
| PLAT300_ALERT_4_G | Atom Site Occupancy of C10                       | Constrained at      | 0.58   | Check  |
| PLAT300_ALERT_4_G | Atom Site Occupancy of C16                       | Constrained at      | 0.68   | Check  |
| PLAT300_ALERT_4_G | Atom Site Occupancy of C17                       | Constrained at      | 0.68   | Check  |
| PLAT300_ALERT_4_G | Atom Site Occupancy of C9A                       | Constrained at      | 0.42   | Check  |
| PLAT300_ALERT_4_G | Atom Site Occupancy of C10A                      | Constrained at      | 0.42   | Check  |
| PLAT300_ALERT_4_G | Atom Site Occupancy of C16A                      | Constrained at      | 0.32   | Check  |
| PLAT300_ALERT_4_G | Atom Site Occupancy of C17A                      | Constrained at      | 0.32   | Check  |
| PLAT300_ALERT_4_G | Atom Site Occupancy of H9A                       | Constrained at      | 0.58   | Check  |
| PLAT300_ALERT_4_G | Atom Site Occupancy of H9B                       | Constrained at      | 0.58   | Check  |
| PLAT300_ALERT_4_G | Atom Site Occupancy of H10A                      | Constrained at      | 0.58   | Check  |
| PLAT300_ALERT_4_G | Atom Site Occupancy of H10B                      | Constrained at      | 0.58   | Check  |
| PLAT300_ALERT_4_G | Atom Site Occupancy of H10C                      | Constrained at      | 0.58   | Check  |
| PLAT300_ALERT_4_G | Atom Site Occupancy of H16A                      | Constrained at      | 0.68   | Check  |
| PLAT300_ALERT_4_G | Atom Site Occupancy of H16B                      | Constrained at      | 0.68   | Check  |
| PLAT300_ALERT_4_G | Atom Site Occupancy of H17A                      | Constrained at      | 0.68   | Check  |
| PLAT300_ALERT_4_G | Atom Site Occupancy of H17B                      | Constrained at      | 0.68   | Check  |
| PLAT300_ALERT_4_G | Atom Site Occupancy of H17C                      | Constrained at      | 0.68   | Check  |
| PLAT300_ALERT_4_G | Atom Site Occupancy of H9AA                      | Constrained at      | 0.42   | Check  |
| PLAT300_ALERT_4_G | Atom Site Occupancy of H9AB                      | Constrained at      | 0.42   | Check  |
| PLAT300_ALERT_4_G | Atom Site Occupancy of H10D                      | Constrained at      | 0.42   | Check  |
| PLAT300_ALERT_4_G | Atom Site Occupancy of H10E                      | Constrained at      | 0.42   | Check  |
| PLAT300_ALERT_4_G | Atom Site Occupancy of H10F                      | Constrained at      | 0.42   | Check  |
| PLAT300_ALERT_4_G | Atom Site Occupancy of H16C                      | Constrained at      | 0.32   | Check  |
| PLAT300_ALERT_4_G | Atom Site Occupancy of H16D                      | Constrained at      | 0.32   | Check  |
| PLAT300_ALERT_4_G | Atom Site Occupancy of H17D                      | Constrained at      | 0.32   | Check  |
| PLAT300_ALERT_4_G | Atom Site Occupancy of H17E                      | Constrained at      | 0.32   | Check  |
| PLAT300_ALERT_4_G | Atom Site Occupancy of H17F                      | Constrained at      | 0.32   | Check  |
| PLAT301_ALERT_3_G | Main Residue Disorder .....                      | (Resd 1 )           | 17%    | Note   |
| PLAT412_ALERT_2_G | Short Intra XH3 .. XHn                           | H19C ..H16D         | 2.07   | Ang.   |
|                   |                                                  | x,y,z =             | 1_555  | Check  |
| PLAT413_ALERT_2_G | Short Inter XH3 .. XHn                           | H6C ..H12D          | 2.13   | Ang.   |
|                   |                                                  | 1/2-x,1/2+y,1/2-z = | 2_555  | Check  |

|                   |                                                  |        |        |
|-------------------|--------------------------------------------------|--------|--------|
| PLAT720_ALERT_4_G | Number of Unusual/Non-Standard Labels .....      | 2      | Note   |
| PLAT793_ALERT_4_G | Model has Chirality at P1 (Centro SPGR)          | R      | Verify |
| PLAT793_ALERT_4_G | Model has Chirality at P2 (Centro SPGR)          | R      | Verify |
| PLAT860_ALERT_3_G | Number of Least-Squares Restraints .....         | 27     | Note   |
| PLAT883_ALERT_1_G | No Info/Value for _atom_sites_solution_primary . | Please | Do !   |
| PLAT910_ALERT_3_G | Missing # of FCF Reflection(s) Below Theta(Min). | 4      | Note   |
| PLAT912_ALERT_4_G | Missing # of FCF Reflections Above STh/L= 0.600  | 1827   | Note   |
| PLAT941_ALERT_3_G | Average HKL Measurement Multiplicity .....       | 3.5    | Low    |
| PLAT952_ALERT_5_G | Calculated (ThMax) and CIF-Reported Lmax Differ. | 4      | Units  |
| PLAT958_ALERT_1_G | Calculated (ThMax) and Actual (FCF) Lmax Differ. | 4      | Units  |
| PLAT978_ALERT_2_G | Number C-C Bonds with Positive Residual Density. | 4      | Info   |

---

|    |                      |                                                              |
|----|----------------------|--------------------------------------------------------------|
| 0  | <b>ALERT level A</b> | = Most likely a serious problem - resolve or explain         |
| 0  | <b>ALERT level B</b> | = A potentially serious problem, consider carefully          |
| 6  | <b>ALERT level C</b> | = Check. Ensure it is not caused by an omission or oversight |
| 50 | <b>ALERT level G</b> | = General information/check it is not something unexpected   |
|    |                      |                                                              |
| 2  | ALERT type 1         | CIF construction/syntax error, inconsistent or missing data  |
| 8  | ALERT type 2         | Indicator that the structure model may be wrong or deficient |
| 11 | ALERT type 3         | Indicator that the structure quality may be low              |
| 34 | ALERT type 4         | Improvement, methodology, query or suggestion                |
| 1  | ALERT type 5         | Informative message, check                                   |

---



---

It is advisable to attempt to resolve as many as possible of the alerts in all categories. Often the minor alerts point to easily fixed oversights, errors and omissions in your CIF or refinement strategy, so attention to these fine details can be worthwhile. In order to resolve some of the more serious problems it may be necessary to carry out additional measurements or structure refinements. However, the purpose of your study may justify the reported deviations and the more serious of these should normally be commented upon in the discussion or experimental section of a paper or in the "special\_details" fields of the CIF. checkCIF was carefully designed to identify outliers and unusual parameters, but every test has its limitations and alerts that are not important in a particular case may appear. Conversely, the absence of alerts does not guarantee there are no aspects of the results needing attention. It is up to the individual to critically assess their own results and, if necessary, seek expert advice.

### Publication of your CIF in IUCr journals

A basic structural check has been run on your CIF. These basic checks will be run on all CIFs submitted for publication in IUCr journals (*Acta Crystallographica*, *Journal of Applied Crystallography*, *Journal of Synchrotron Radiation*); however, if you intend to submit to *Acta Crystallographica Section C* or *E* or *IUCrData*, you should make sure that full publication checks are run on the final version of your CIF prior to submission.

### Publication of your CIF in other journals

Please refer to the *Notes for Authors* of the relevant journal for any special instructions relating to CIF submission.

PLATON version of 28/11/2022; check.def file version of 28/11/2022

Datablock msb\_sr\_419 - ellipsoid plot

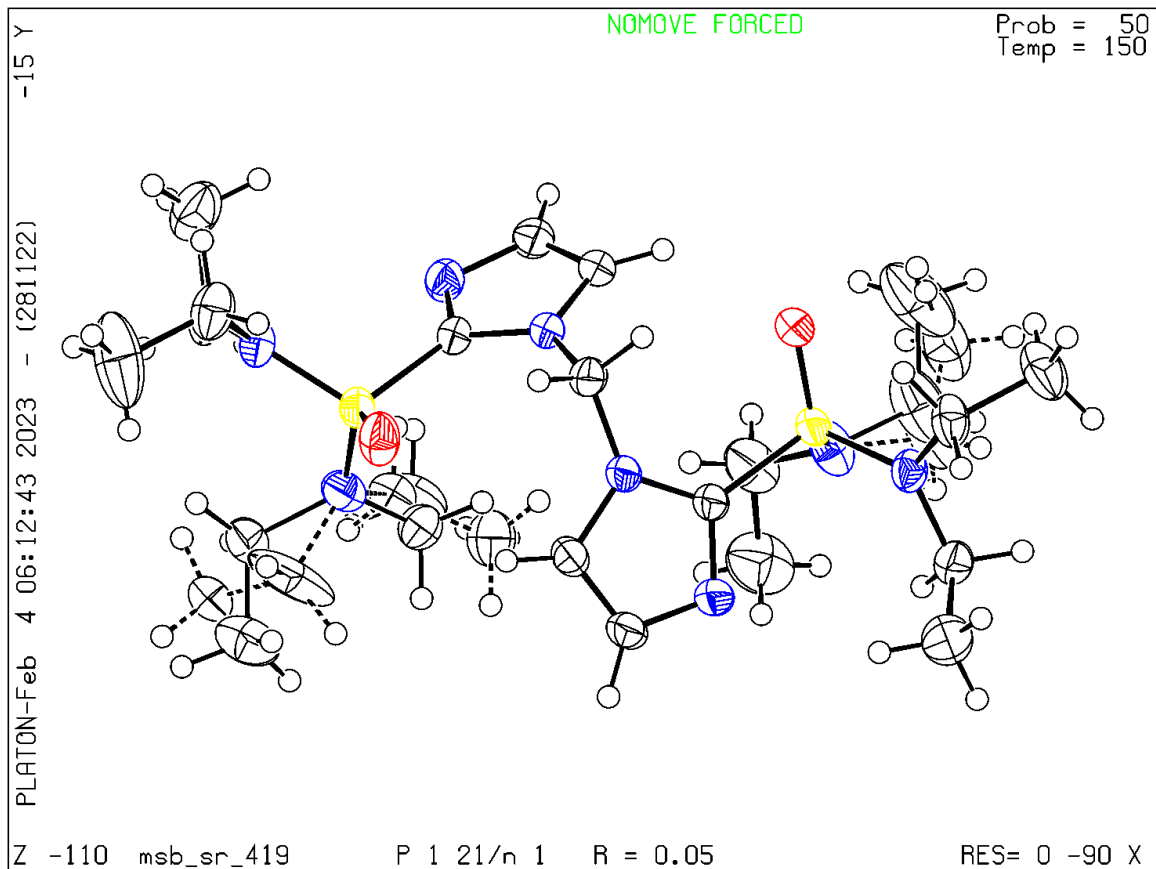

Supplement: s1 [file s1 › Compound 2_cifreport (1).pdf]
