# Supplementary material for: Synthesis and Structural Studies of Complexes of Bis(pentafluorophenyl)mercury with Di(phosphane oxide) Ligands
Source: MDPI journal article supplement (doi:10.3390/cryst13030530), 2023-03-20

## checkCIF/PLATON report

Structure factors have been supplied for datablock(s) 1\_a

THIS REPORT IS FOR GUIDANCE ONLY. IF USED AS PART OF A REVIEW PROCEDURE FOR PUBLICATION, IT SHOULD NOT REPLACE THE EXPERTISE OF AN EXPERIENCED CRYSTALLOGRAPHIC REFEREE.

No syntax errors found.      CIF dictionary      Interpreting this report

### Datablock: 1\_a

---

|                        |                              |                                   |
|------------------------|------------------------------|-----------------------------------|
| Bond precision:        | C-C = 0.0089 A               | Wavelength=0.71073                |
| Cell:                  | a=11.480(2)                  | b=12.900(3)      c=15.330(3)      |
|                        | alpha=110.03(3)              | beta=97.81(3)      gamma=95.36(3) |
| Temperature:           | 100 K                        |                                   |
|                        | Calculated                   | Reported                          |
| Volume                 | 2089.1(9)                    | 2089.2(8)                         |
| Space group            | P -1                         | P -1                              |
| Hall group             | -P 1                         | -P 1                              |
| Moiety formula         | C23 H46 N8 O2 P2, C12 F10 Hg | C35 H46 F10 Hg N8 O2 P2           |
| Sum formula            | C35 H46 F10 Hg N8 O2 P2      | C35 H46 F10 Hg N8 O2 P2           |
| Mr                     | 1063.33                      | 1063.33                           |
| Dx, g cm <sup>-3</sup> | 1.690                        | 1.690                             |
| Z                      | 2                            | 2                                 |
| Mu (mm <sup>-1</sup> ) | 3.847                        | 3.847                             |
| F000                   | 1056.0                       | 1056.0                            |
| F000'                  | 1052.27                      |                                   |
| h,k,lmax               | 13,15,18                     | 13,15,18                          |
| Nref                   | 7656                         | 7572                              |
| Tmin,Tmax              | 0.738,0.806                  |                                   |
| Tmin'                  | 0.703                        |                                   |

Correction method= Not given

Data completeness= 0.989      Theta(max)= 25.348

|                               |                                 |
|-------------------------------|---------------------------------|
| R(reflections)= 0.0372( 6582) | wR2(reflections)= 0.0965( 7572) |
| S = 1.068                     | Npar= 711                       |

---

The following ALERTS were generated. Each ALERT has the format

**test-name\_ALERT\_alert-type\_alert-level.**

Click on the hyperlinks for more details of the test.

---

### Alert level C

|                   |                                                  |              |
|-------------------|--------------------------------------------------|--------------|
| PLAT042_ALERT_1_C | Calc. and Reported MoietyFormula Strings Differ  | Please Check |
| PLAT241_ALERT_2_C | High 'MainMol' Ueq as Compared to Neighbors of   | N8 Check     |
| PLAT250_ALERT_2_C | Large U3/U1 Ratio for Average U(i,j) Tensor .... | 2.2 Note     |
| PLAT250_ALERT_2_C | Large U3/U1 Ratio for Average U(i,j) Tensor .... | 3.3 Note     |
| PLAT334_ALERT_2_C | Small <C-C> Benzene Dist. C24 -C29 .             | 1.37 Ang.    |
| PLAT342_ALERT_3_C | Low Bond Precision on C-C Bonds .....            | 0.00886 Ang. |
| PLAT911_ALERT_3_C | Missing FCF Refl Between Thmin & STh/L= 0.600    | 75 Report    |
| PLAT972_ALERT_2_C | Check Calcd Resid. Dens. 1.00Ang From Hg2        | -2.22 eA-3   |

---

### Alert level G

|                   |                                                                                    |               |
|-------------------|------------------------------------------------------------------------------------|---------------|
| ABSMU01_ALERT_1_G | Calculation of _exptl_absorpt_correction_mu not performed for this radiation type. |               |
| PLAT003_ALERT_2_G | Number of Uiso or Uij Restrained non-H Atoms ...                                   | 24 Report     |
| PLAT154_ALERT_1_G | The s.u.'s on the Cell Angles are Equal ..(Note)                                   | 0.03 Degree   |
| PLAT178_ALERT_4_G | The CIF-Embedded .res File Contains SIMU Records                                   | 6 Report      |
| PLAT180_ALERT_4_G | Check Cell Rounding: # of Values Ending with 0 =                                   | 3 Note        |
| PLAT188_ALERT_3_G | A Non-default SIMU Restraint Value has been used                                   | 0.0100 Report |
| PLAT188_ALERT_3_G | A Non-default SIMU Restraint Value has been used                                   | 0.0100 Report |
| PLAT188_ALERT_3_G | A Non-default SIMU Restraint Value has been used                                   | 0.0100 Report |
| PLAT188_ALERT_3_G | A Non-default SIMU Restraint Value has been used                                   | 0.0100 Report |
| PLAT188_ALERT_3_G | A Non-default SIMU Restraint Value has been used                                   | 0.0100 Report |
| PLAT188_ALERT_3_G | A Non-default SIMU Restraint Value has been used                                   | 0.0100 Report |
| PLAT230_ALERT_2_G | Hirshfeld Test Diff for N1 --C3 .                                                  | 10.4 s.u.     |
| PLAT230_ALERT_2_G | Hirshfeld Test Diff for N8 --C10 .                                                 | 21.8 s.u.     |
| PLAT301_ALERT_3_G | Main Residue Disorder .....(Resd 1 )                                               | 51% Note      |
| PLAT410_ALERT_2_G | Short Intra H...H Contact H4B ..H3A .                                              | 2.14 Ang.     |
|                   | x,y,z =                                                                            | 1_555 Check   |
| PLAT412_ALERT_2_G | Short Intra XH3 .. XHn H16A ..H19D .                                               | 2.04 Ang.     |
|                   | x,y,z =                                                                            | 1_555 Check   |
| PLAT412_ALERT_2_G | Short Intra XH3 .. XHn H17C ..H18A .                                               | 2.00 Ang.     |
|                   | x,y,z =                                                                            | 1_555 Check   |
| PLAT432_ALERT_2_G | Short Inter X...Y Contact C7 ..C24 .                                               | 3.18 Ang.     |
|                   | x,y,z =                                                                            | 1_555 Check   |
| PLAT720_ALERT_4_G | Number of Unusual/Non-Standard Labels .....                                        | 5 Note        |
| PLAT811_ALERT_5_G | No ADDSYM Analysis: Too Many Excluded Atoms ....                                   | ! Info        |
| PLAT860_ALERT_3_G | Number of Least-Squares Restraints .....                                           | 228 Note      |
| PLAT912_ALERT_4_G | Missing # of FCF Reflections Above STh/L= 0.600                                    | 11 Note       |
| PLAT941_ALERT_3_G | Average HKL Measurement Multiplicity .....                                         | 4.9 Low       |
| PLAT978_ALERT_2_G | Number C-C Bonds with Positive Residual Density.                                   | 0 Info        |

---

0 **ALERT level A** = Most likely a serious problem - resolve or explain

0 **ALERT level B** = A potentially serious problem, consider carefully

8 **ALERT level C** = Check. Ensure it is not caused by an omission or oversight

24 **ALERT level G** = General information/check it is not something unexpected

3 ALERT type 1 CIF construction/syntax error, inconsistent or missing data

13 ALERT type 2 Indicator that the structure model may be wrong or deficient  
11 ALERT type 3 Indicator that the structure quality may be low  
4 ALERT type 4 Improvement, methodology, query or suggestion  
1 ALERT type 5 Informative message, check

---

It is advisable to attempt to resolve as many as possible of the alerts in all categories. Often the minor alerts point to easily fixed oversights, errors and omissions in your CIF or refinement strategy, so attention to these fine details can be worthwhile. In order to resolve some of the more serious problems it may be necessary to carry out additional measurements or structure refinements. However, the purpose of your study may justify the reported deviations and the more serious of these should normally be commented upon in the discussion or experimental section of a paper or in the "special\_details" fields of the CIF. checkCIF was carefully designed to identify outliers and unusual parameters, but every test has its limitations and alerts that are not important in a particular case may appear. Conversely, the absence of alerts does not guarantee there are no aspects of the results needing attention. It is up to the individual to critically assess their own results and, if necessary, seek expert advice.

### **Publication of your CIF in IUCr journals**

A basic structural check has been run on your CIF. These basic checks will be run on all CIFs submitted for publication in IUCr journals (*Acta Crystallographica*, *Journal of Applied Crystallography*, *Journal of Synchrotron Radiation*); however, if you intend to submit to *Acta Crystallographica Section C* or *E* or *IUCrData*, you should make sure that full publication checks are run on the final version of your CIF prior to submission.

### **Publication of your CIF in other journals**

Please refer to the *Notes for Authors* of the relevant journal for any special instructions relating to CIF submission.

---

**PLATON version of 28/11/2022; check.def file version of 28/11/2022**

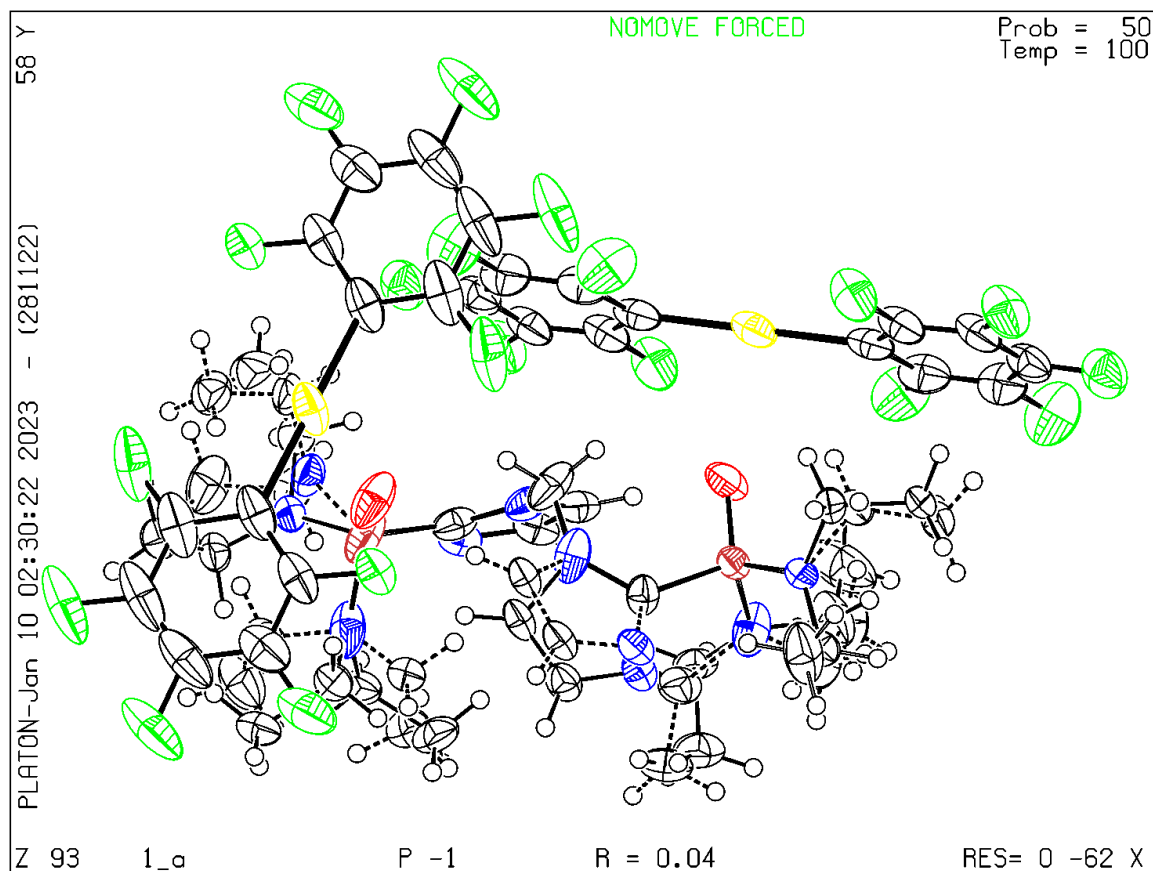

Supplement: s1 [file s1 › Compound 2Hg_cif report.pdf]
