# Supplementary material for: Synthesis and Structural Studies of Complexes of Bis(pentafluorophenyl)mercury with Di(phosphane oxide) Ligands
Source: MDPI journal article supplement (doi:10.3390/cryst13030530), 2023-03-20
Supplement: s1 [file s1]

Archive with 5 entries (5 files):
- Compound 1Hg cif report.pdf
- Compound 2Hg_cif report.pdf
- Compound 2_cifreport (1).pdf
- Compound_3Hg_cif report.pdf
- crystals-2265268-supplementary-XML.pdf
