# Supplementary material for: Synthesis and Structural Studies of Complexes of Bis(pentafluorophenyl)mercury with Di(phosphane oxide) Ligands
Source: MDPI journal article supplement (doi:10.3390/cryst13030530), 2023-03-20
Supplement: s1 [file s1 › crystals-2265268-supplementary-XML.pdf]

# Supplementary Data

## Synthesis and Structural Studies of Complexes of Bis(pentafluorophenyl)mercury with Di(phosphane oxide) Ligands

Shalini Rangarajan <sup>1</sup>, Owen A. Beaumont <sup>2</sup>, Zhifang Guo <sup>2</sup>, Maravanji S. Balakrishna <sup>1</sup>, Glen B. Deacon <sup>2</sup> and Victoria L. Blair <sup>2,\*</sup>

<sup>1</sup> IITB-Monash Academy, Indian Institute of Technology, 400076 Bombay, India

<sup>2</sup> School of Chemistry, Monash University, 3800 Melbourne, Australia

\* Correspondence: victoria.blair@monash.edu.au

## Table of contents

|                                                                                                                   |           |
|-------------------------------------------------------------------------------------------------------------------|-----------|
| 1) $^{31}\text{P}\{^1\text{H}\}$ NMR spectrum of <b>1Hg</b> .                                                     | S2        |
| 2) $^{19}\text{F}\{^1\text{H}\}$ NMR spectrum of <b>1Hg</b> .                                                     | S2        |
| 3) IR spectrum of <b>1Hg</b> .                                                                                    | S3        |
| 4) Intermolecular contacts and interactions in compound <b>1Hg</b> .                                              | S3 – S5   |
| 5) $^{31}\text{P}\{^1\text{H}\}$ NMR spectrum of the reaction mixture (Scheme 1.2)<br>having compound <b>2a</b> . | S5        |
| 6) $^1\text{H}$ NMR spectrum of <b>2</b> .                                                                        | S6        |
| 7) $^{31}\text{P}\{^1\text{H}\}$ NMR spectrum of <b>2</b> .                                                       | S6        |
| 8) $^{13}\text{C}$ NMR spectrum of <b>2</b> .                                                                     | S7        |
| 9) IR spectrum of ligand <b>2</b> .                                                                               | S7        |
| 10) Intermolecular contacts and interactions in compound <b>2</b> .                                               | S8        |
| 11) Intermolecular contacts and interactions in compound <b>2Hg</b> .                                             | S8 – S12  |
| 12) $^{19}\text{F}\{^1\text{H}\}$ NMR spectrum of <b>3Hg</b> .                                                    | S12       |
| 13) $^{31}\text{P}\{^1\text{H}\}$ NMR spectrum of <b>3Hg</b> .                                                    | S13       |
| 14) IR spectrum of <b>3</b> .                                                                                     | S13       |
| 15) IR spectrum of <b>3Hg</b> .                                                                                   | S14       |
| 16) Intermolecular contacts and interactions in complex <b>3Hg</b> .                                              | S14 – S15 |
| 17) Intramolecular interactions in complexes <b>1Hg</b> , <b>2Hg</b> and <b>3Hg</b> .                             | S15       |

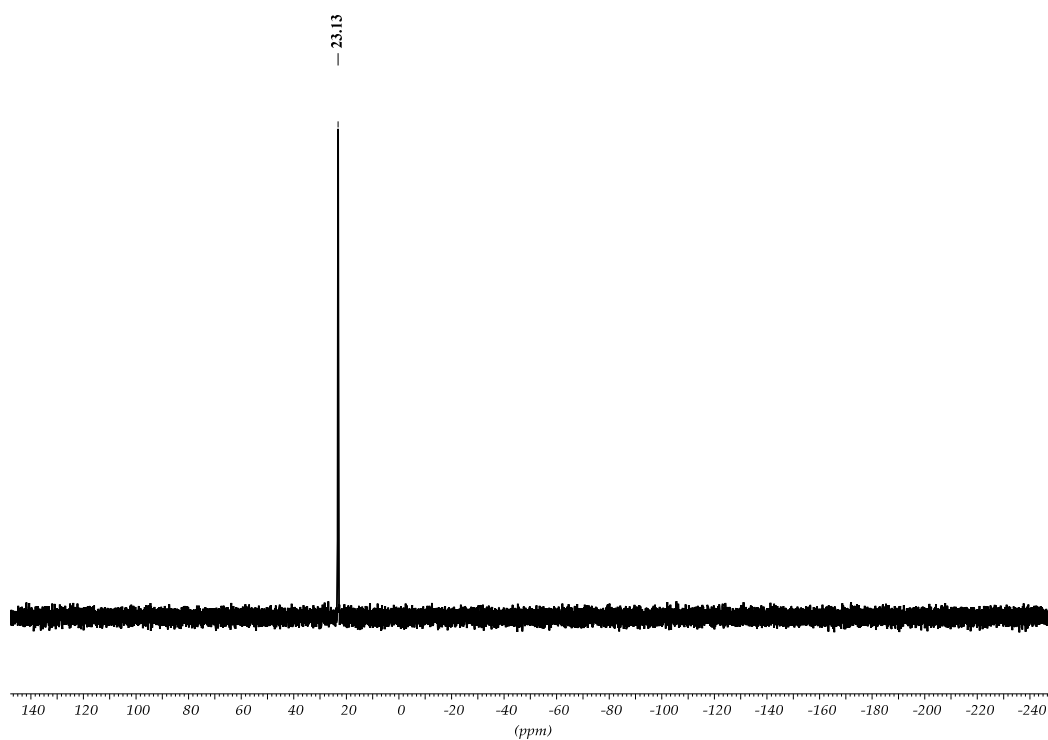

**Figure S1.**  $^{31}\text{P}\{^1\text{H}\}$  NMR spectrum of **1Hg**.

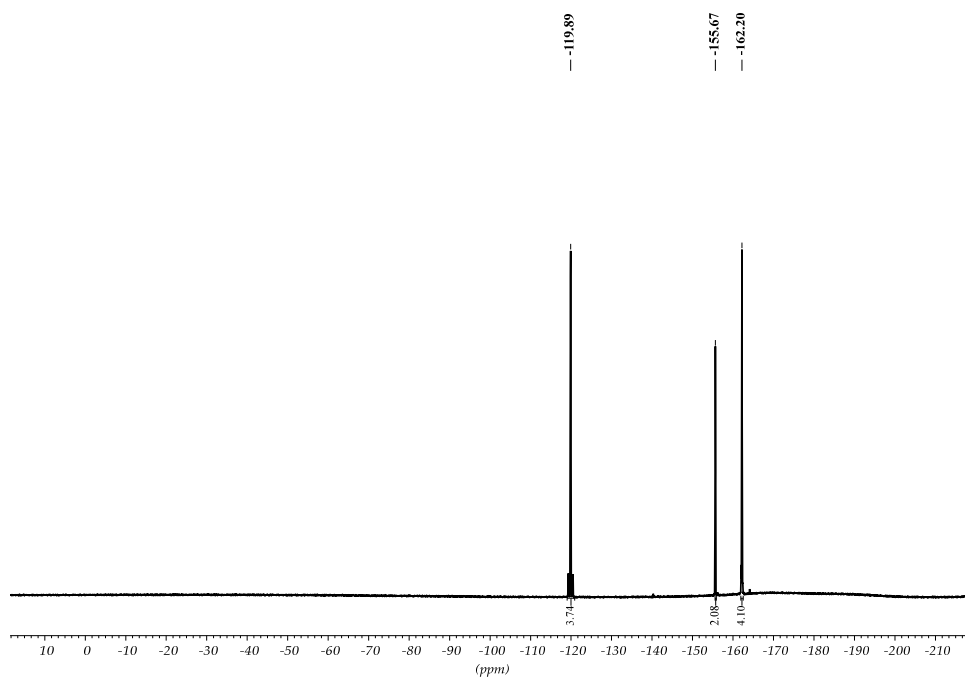

**Figure S2.**  $^{19}\text{F}\{^1\text{H}\}$  NMR spectrum of **1Hg**.

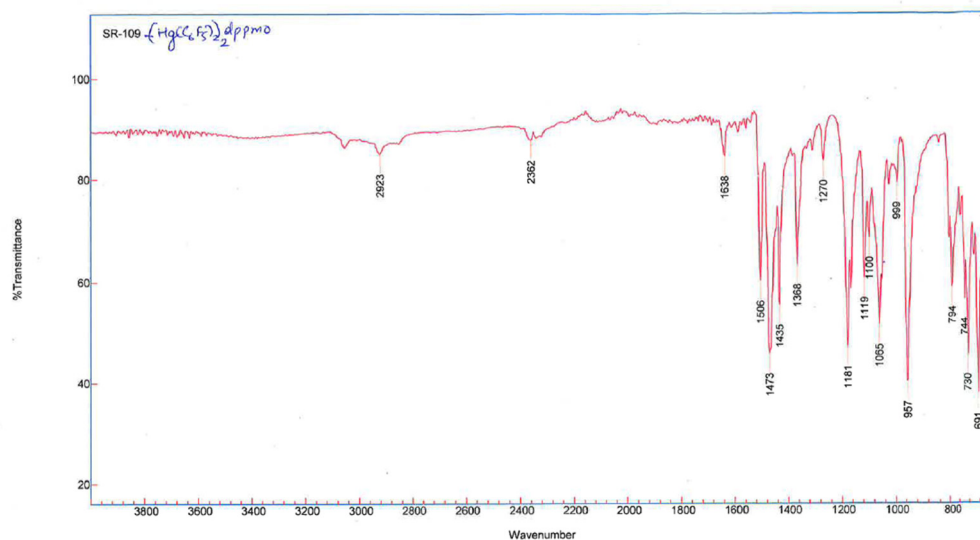

**Figure S3.** IR spectrum of **1Hg**.

**Table S1.** Intermolecular contacts and interactions in compound **1Hg**

| <b>C<math>\cdots</math>F bond contacts</b>     |       |
|------------------------------------------------|-------|
| C12-F5                                         | 3.007 |
| C9-F4                                          | 3.153 |
| C15-F6                                         | 3.164 |
| C8-F6                                          | 3.063 |
| <b>CH<math>\cdots</math>FC interactions</b>    |       |
| H13(CH2)-F3                                    | 2.471 |
| H15-F6                                         | 2.496 |
| <b><math>\pi \cdots \pi</math> interaction</b> |       |
| C2-C18                                         | 3.384 |

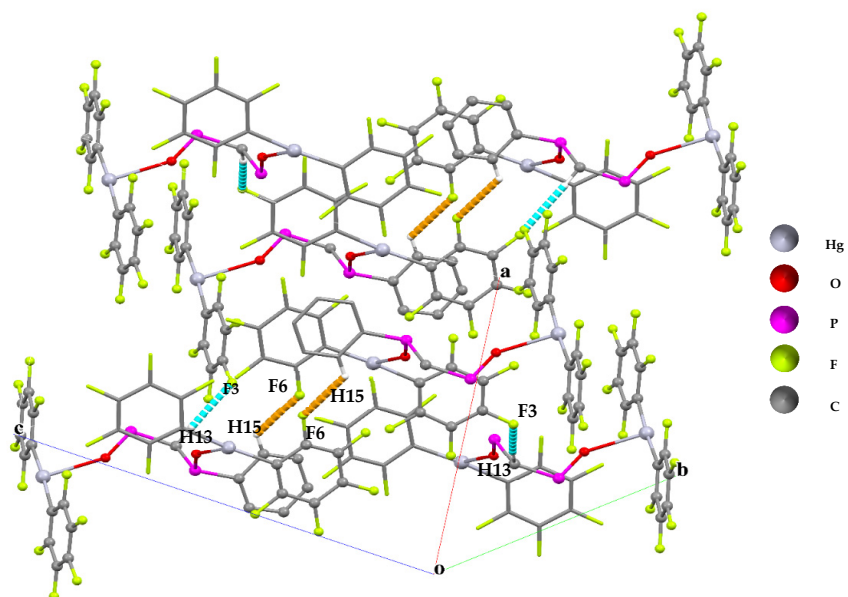

**Figure S4.** Packing diagrams showing the two-dimensional arrangement of complex **1Hg** involving: intermolecular H...F interactions (greenish-blue and orange dotted lines), which propagate along the *a*- and *b*-axes.

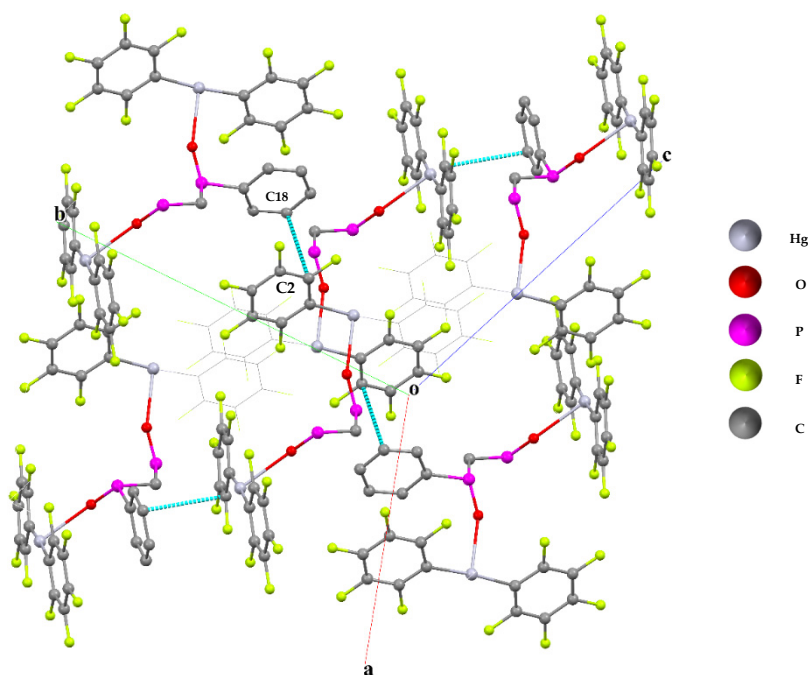

**Figure S5.** Packing diagrams showing the two-dimensional arrangement of complex **4** involving: intermolecular  $\pi \cdots \pi$  interactions (greenish-blue dotted lines), which propagate along the *a*- and *b*-axes.

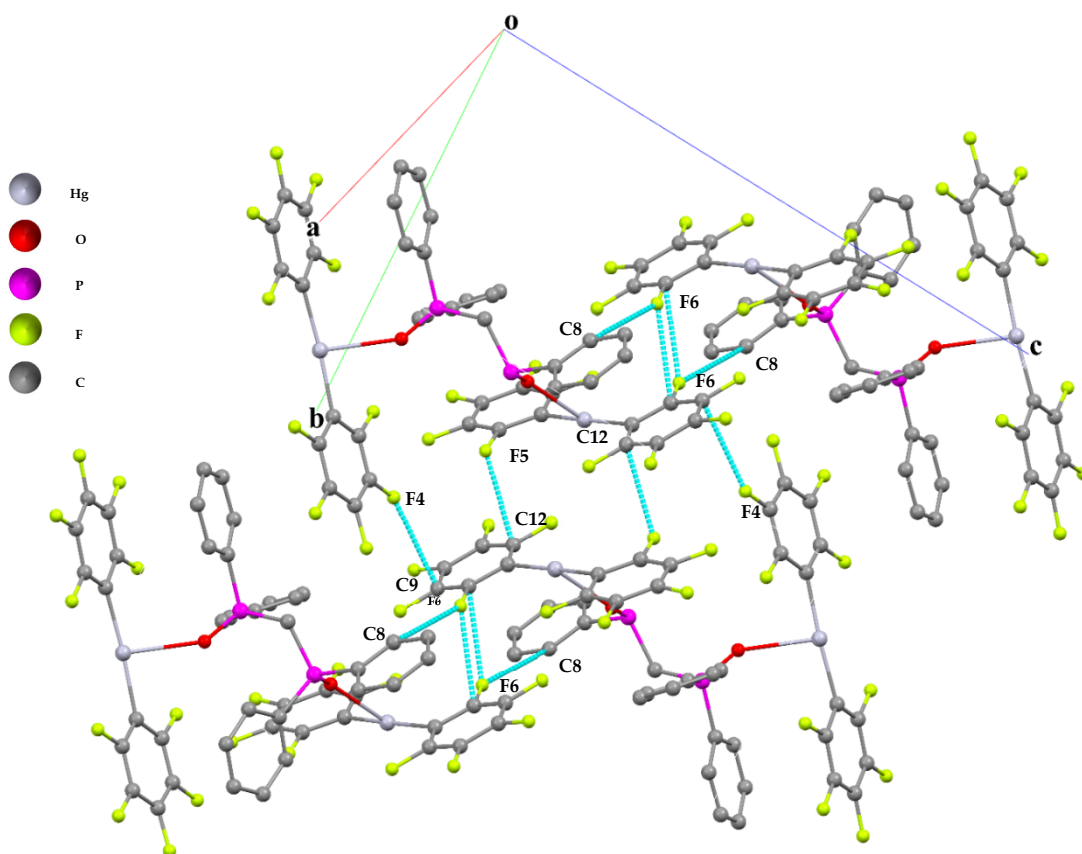

**Figure S6.** Packing diagrams showing the two-dimensional arrangement of complex **1Hg** involving: intermolecular C...F contacts (greenish-blue dotted lines), which propagate along the *a*- and *b*-axes.

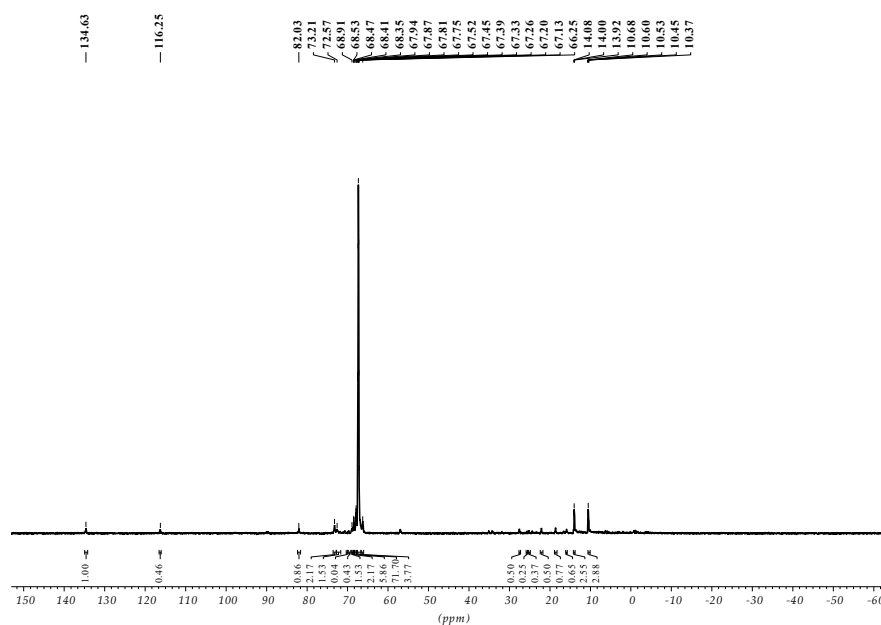

**Figure S7.**  $^{31}\text{P}\{^1\text{H}\}$  NMR spectrum of the reaction mixture (Scheme 1.2) containing compound **2a**.

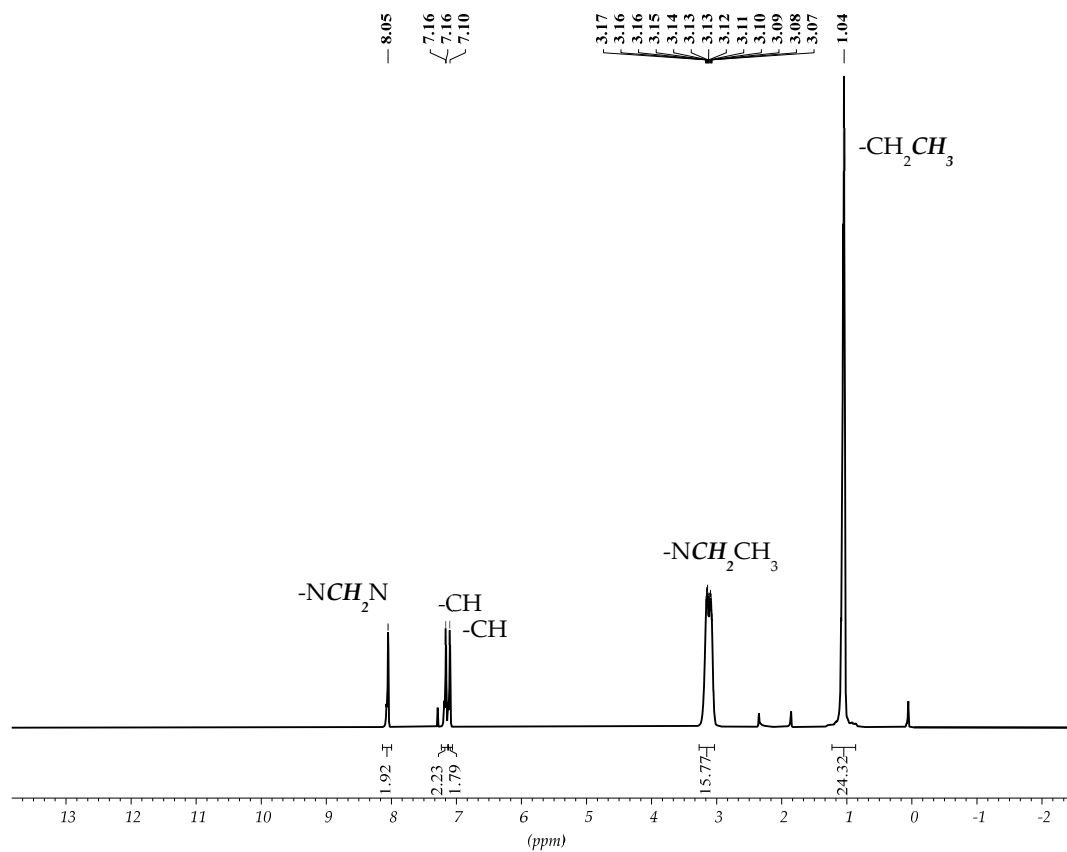

**Figure S8.**  $^1\text{H}$  NMR spectrum of **2**.

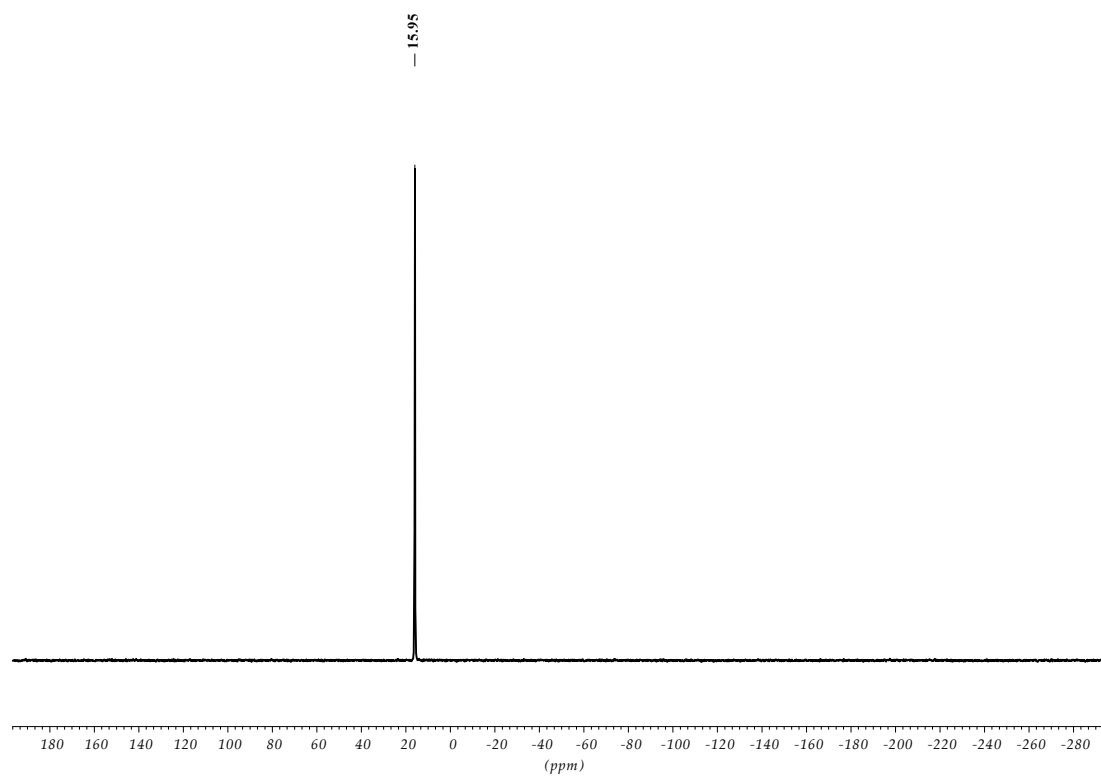

**Figure S9.**  $^{31}\text{P}\{^1\text{H}\}$  NMR spectrum of **2**.

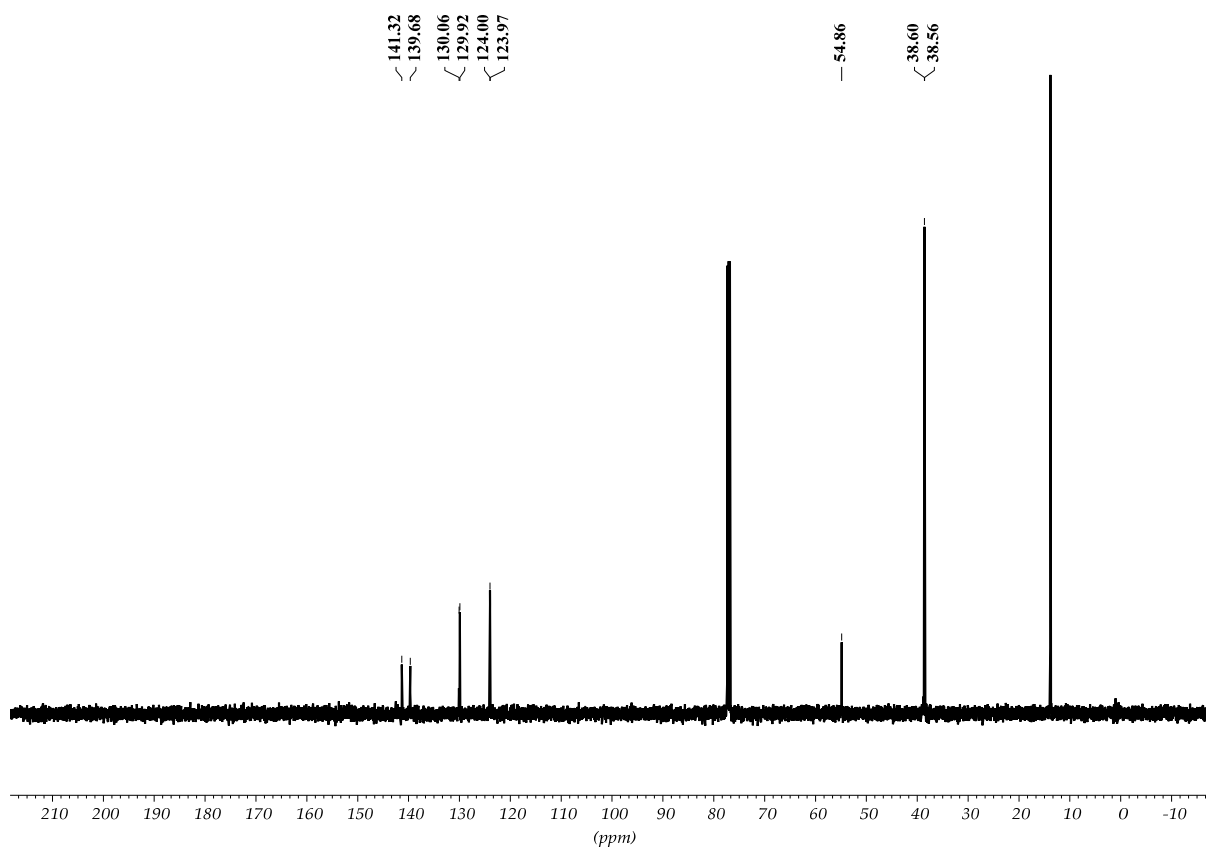

**Figure S10.** <sup>13</sup>C NMR spectrum of **2**.

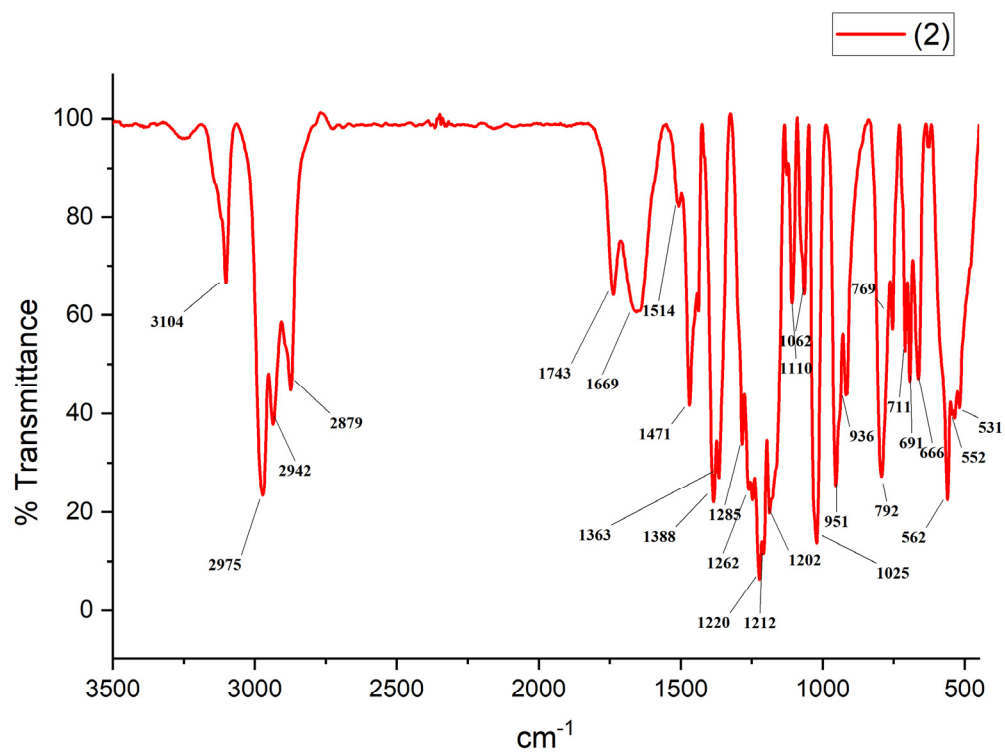

**Figure S11.** IR spectrum of ligand **2**.

**Table S2.** Intermolecular contacts and interactions in compounds **2**.

| C-H...C-H interactions |       |
|------------------------|-------|
| H22B-C3                | 2.789 |
| H22A-C15               | 2.785 |
| C-H...O interaction    |       |
| H1B-O2                 | 2.642 |

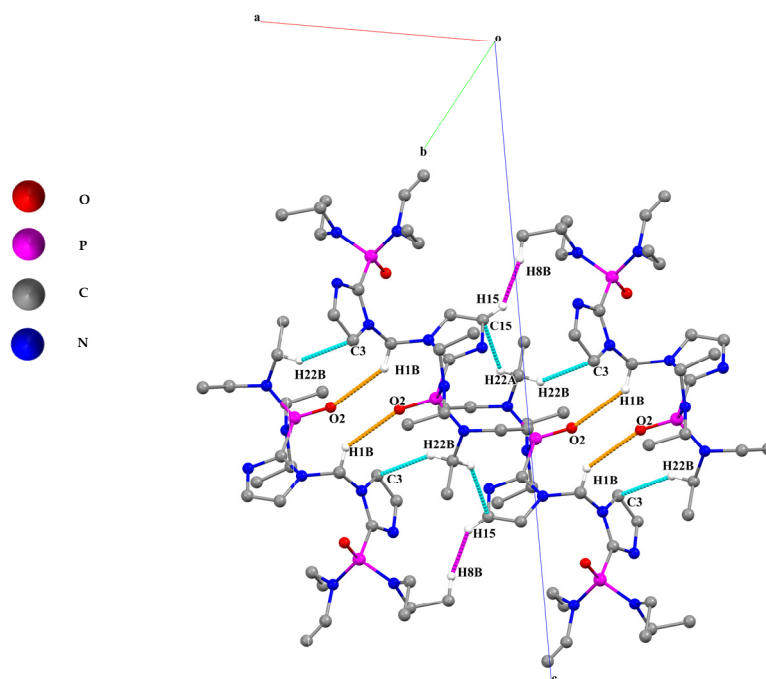

**Figure S12.** Packing diagrams showing the two-dimensional arrangement of ligand biphosphane **2** involving (i) intermolecular C...H interactions (greenish-blue and orange dotted lines), which propagate along the *a*- and *c*-axes, (ii) intermolecular H...O interactions (orange dotted lines), which propagate along the *a*-axis and (iii) intermolecular H...H contacts (pink dotted lines), which propagate along the *c*-axis.

**Table S3.** Intermolecular contacts and interactions in complex **2Hg**

| C...F bond contacts     |       |
|-------------------------|-------|
| C33-F4                  | 3.017 |
| C33-F5                  | 3.070 |
| C-H ...F-C interactions |       |
| H43A-F1                 | 2.438 |
| H23B-F2                 | 2.373 |

| C-H $\cdots$ C-H contacts  |       |
|----------------------------|-------|
| H10B-C31                   | 3.043 |
| H45C-H8A                   | 2.335 |
| C-H $\cdots$ N interaction |       |
| H22A-N6                    | 2.693 |

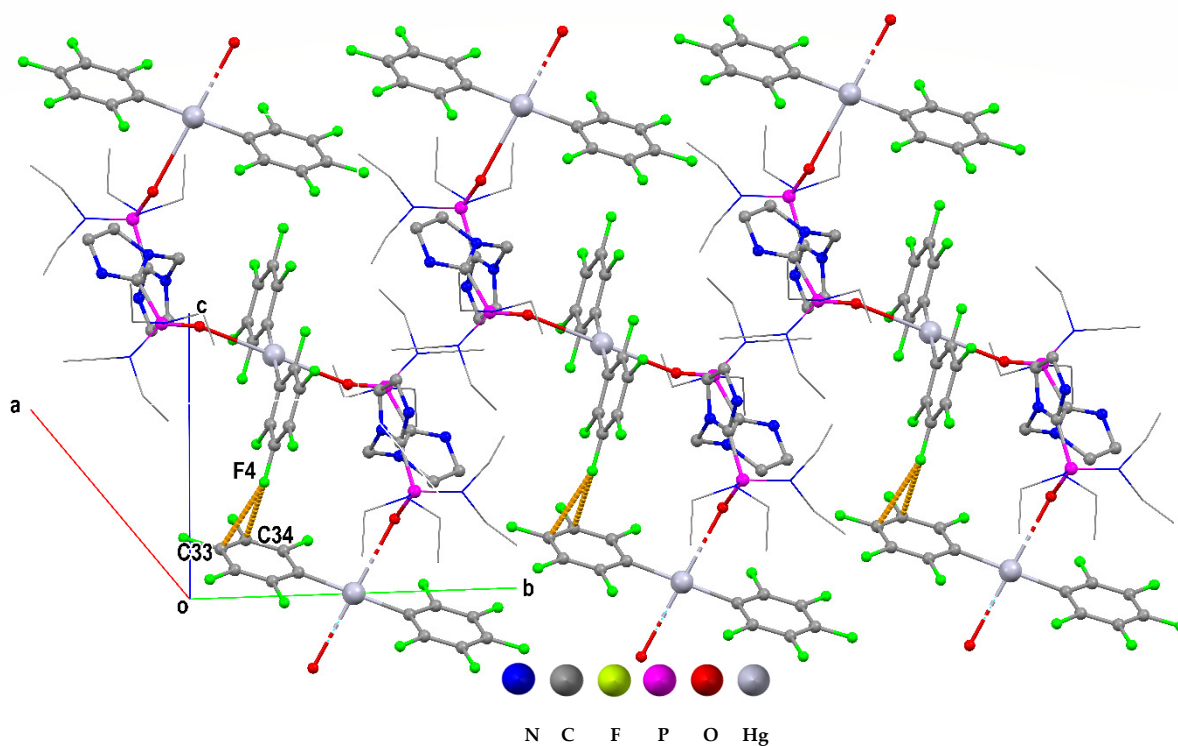

**Figure S13.** Packing diagrams showing the two-dimensional arrangement of complex **2Hg** involving intermolecular C $\cdots$ F contacts (orange dotted lines), which propagate along the *c*-axis.

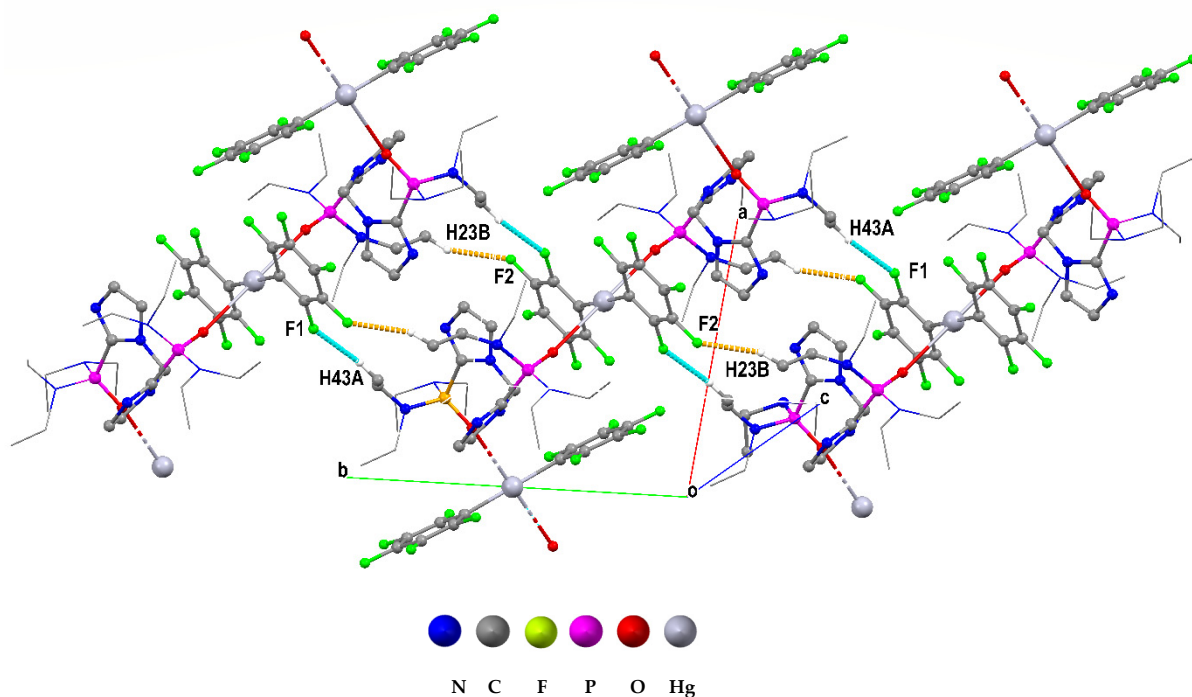

**Figure S14.** Packing diagrams showing the two-dimensional arrangement of complex **2Hg** involving intermolecular C...F contacts (greenish blue dotted lines) and H...F interactions (orange dotted lines), which propagate along the *b*-axis.

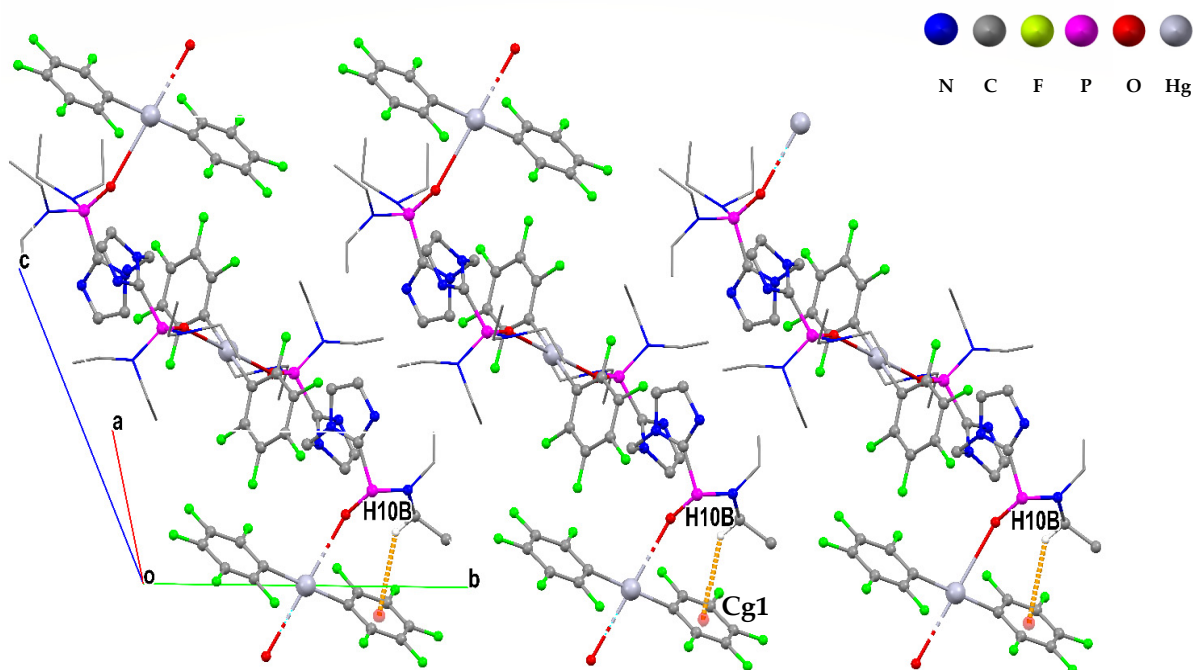

**Figure S15.** Packing diagrams showing the two-dimensional arrangement of complex **2Hg** involving: Cg1...H interactions (orange dotted lines) along *a*-axis direction.

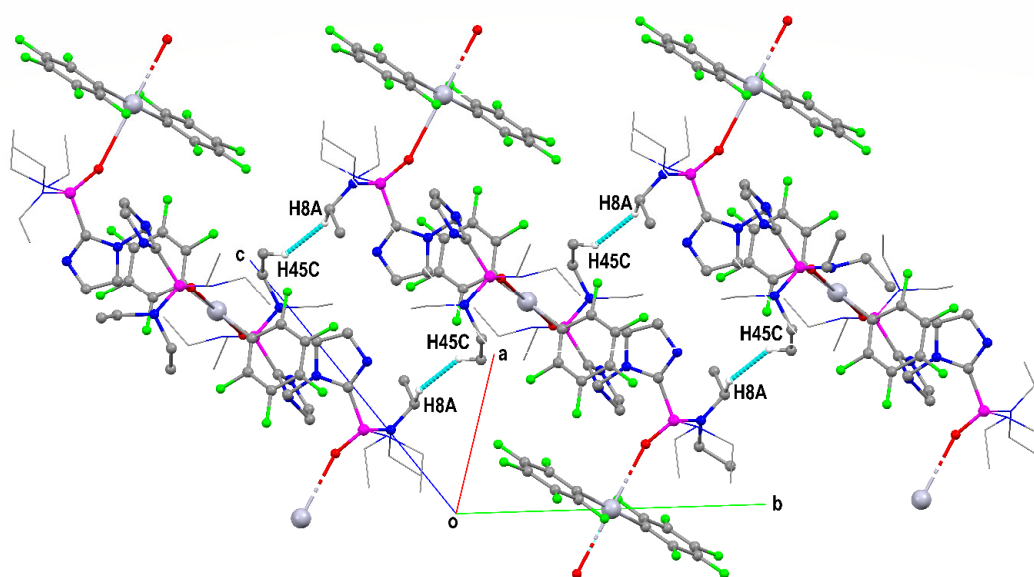

**Figure S16.** Packing diagrams showing the two-dimensional arrangement of complex **2Hg** involving intermolecular H...H contacts (greenish blue dotted lines), which propagate along the *b*-axis.

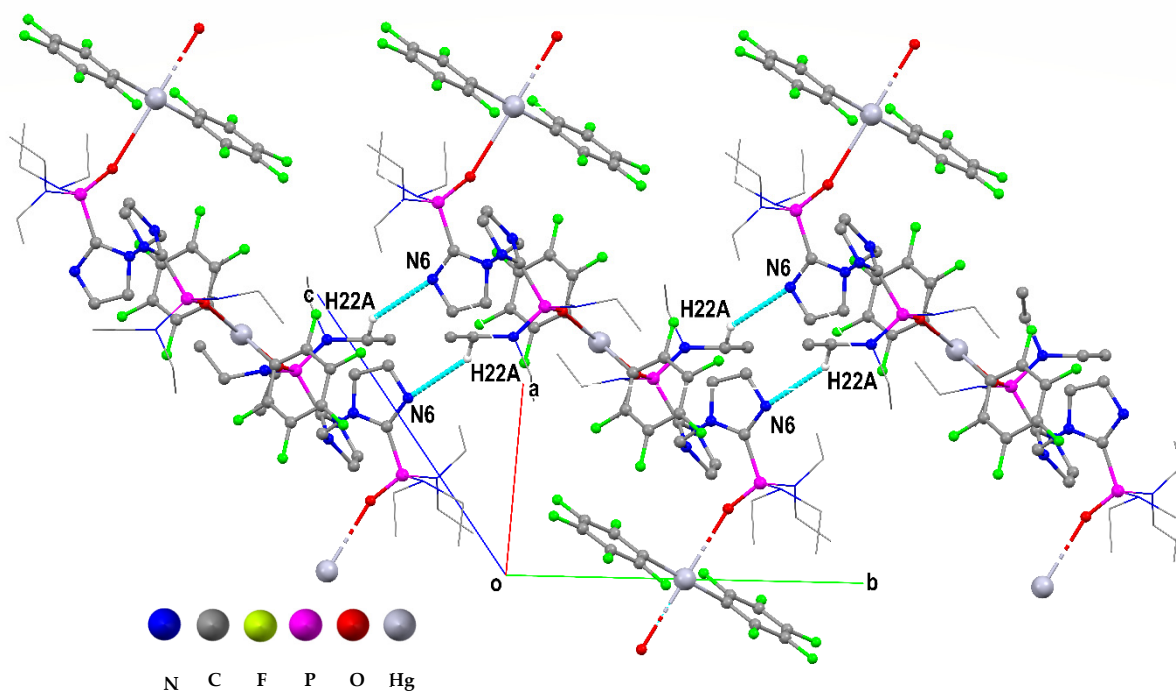

**Figure S17.** Packing diagrams showing the two-dimensional arrangement of complex **2Hg** involving intermolecular N...H interactions (greenish blue dotted lines), which propagate along the *b*-axis.

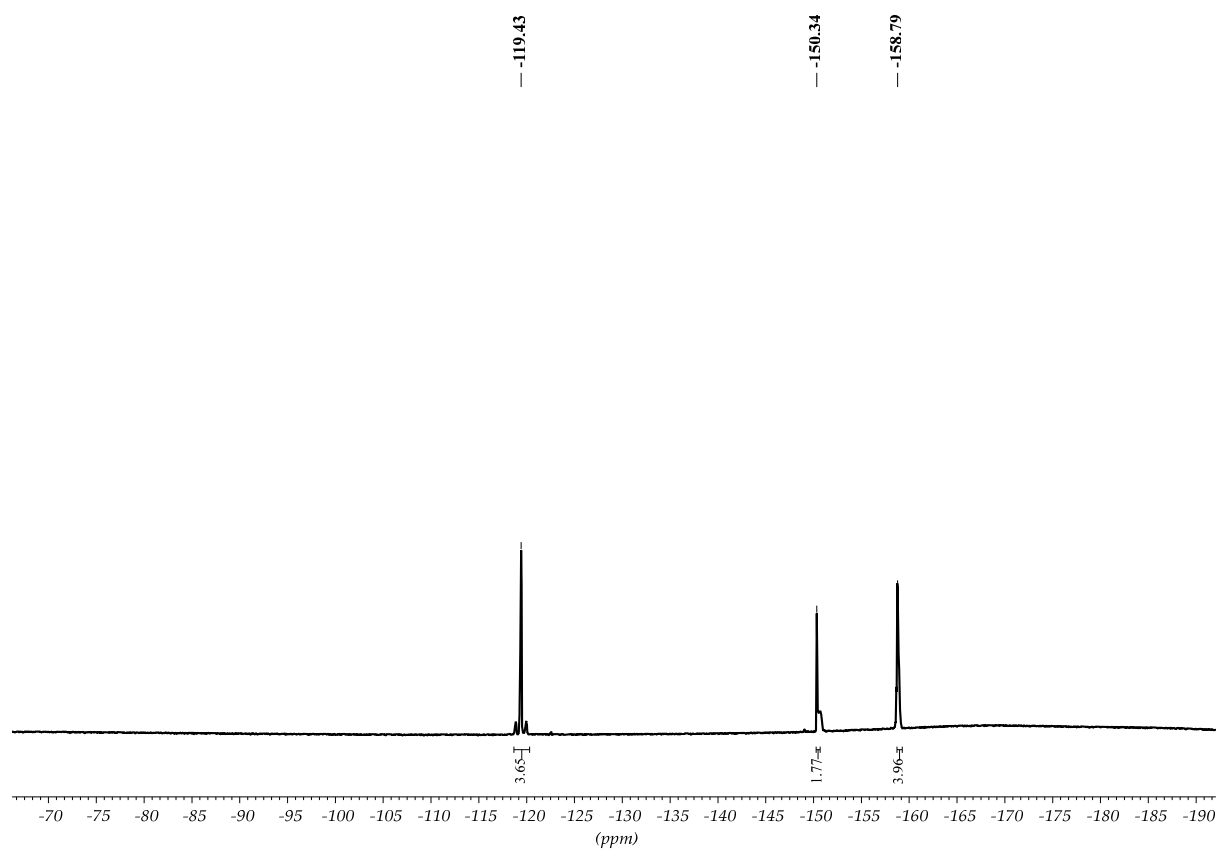

**Figure S18.**  $^{19}\text{F}\{^1\text{H}\}$  NMR spectrum of  $3\text{Hg}$ .

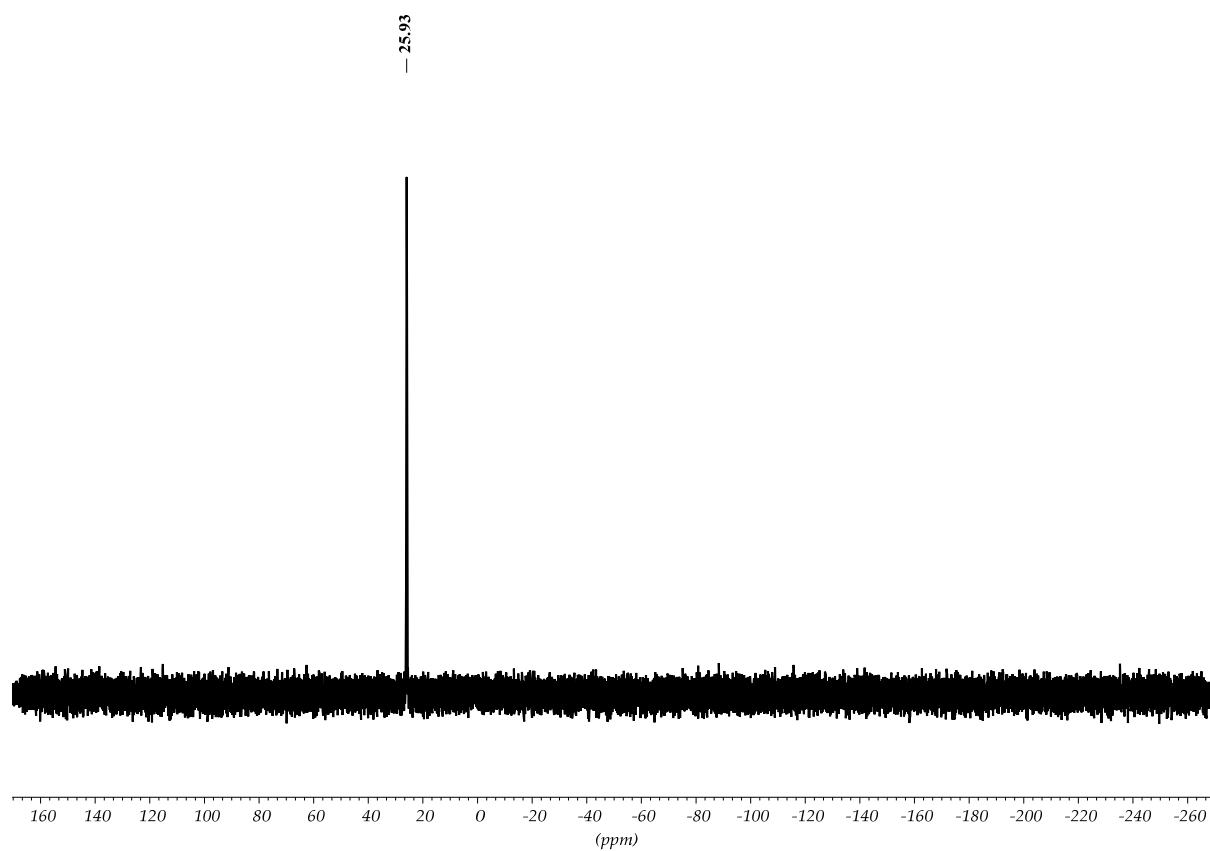

**Figure S19.**  $^{31}\text{P}\{^1\text{H}\}$  NMR spectrum of  $3\text{Hg}$ .

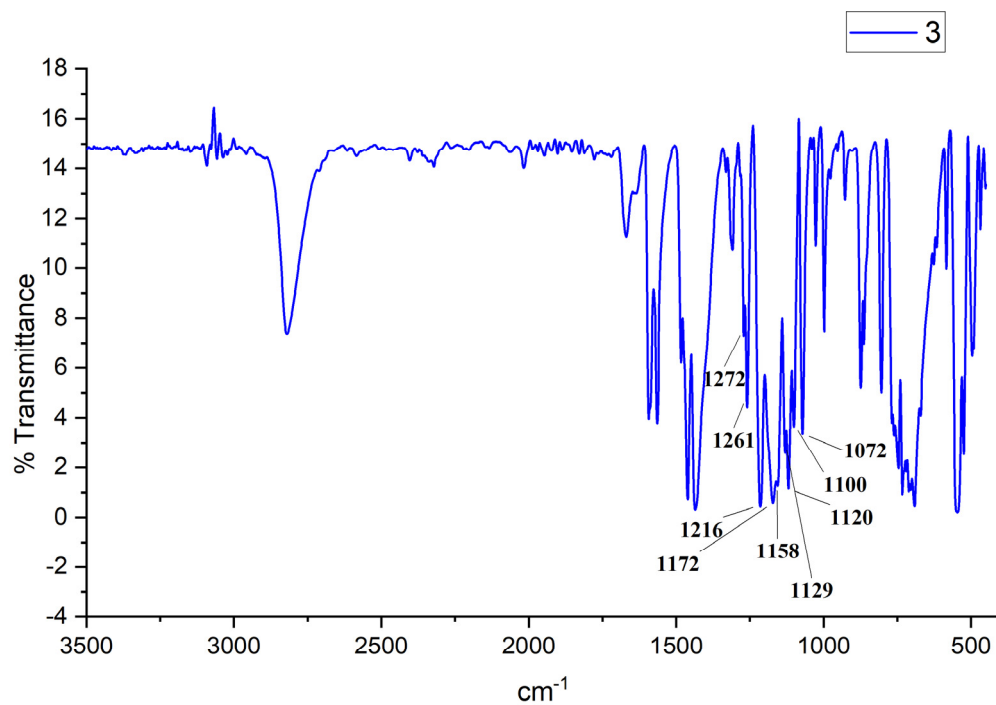

**Figure S20.** IR spectrum of **3**.

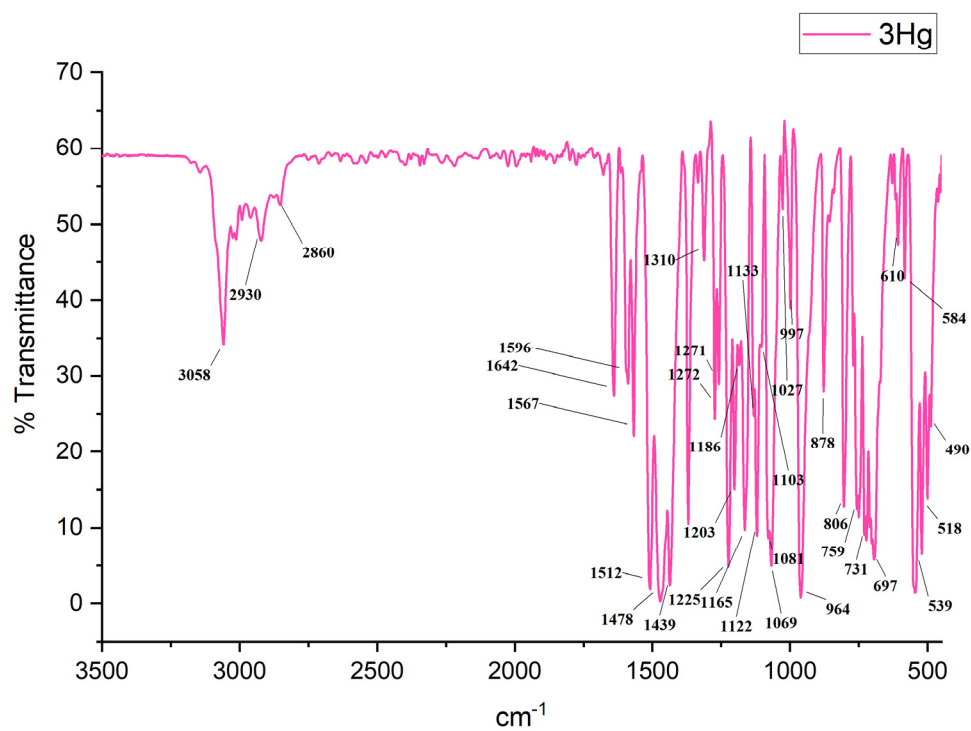

**Figure S21.** IR spectrum of **3Hg**.

**Table S4. Intermolecular contacts and interactions in complex 3Hg**

| <b>C...F contacts</b>        |       |
|------------------------------|-------|
| C8-F2                        | 3.153 |
| C45-F9                       | 3.151 |
| <b>CH ...FC interactions</b> |       |
| H24-F4                       | 2.483 |
| H17-F10                      | 2.593 |
| H35-F9                       | 2.407 |
| <b>H-C ... O interaction</b> |       |
| C47-O3                       | 3.191 |

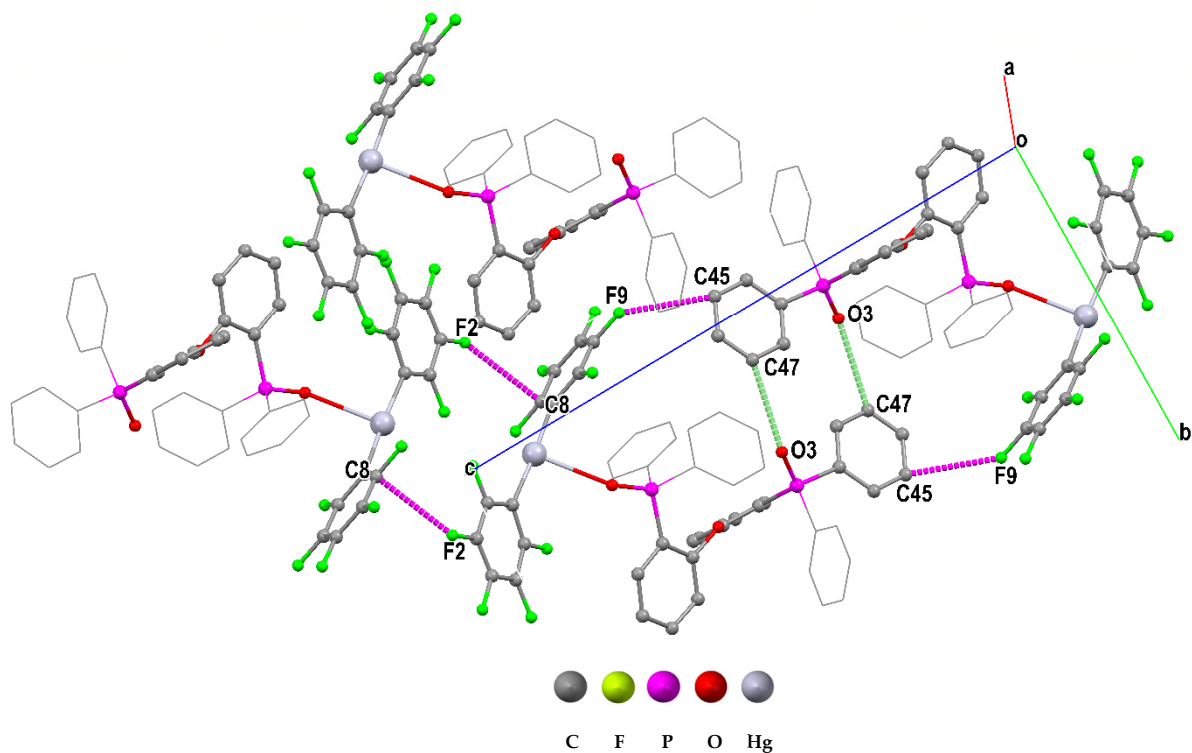

**Figure S22.** Packing diagrams showing the two-dimensional arrangement of complex **3Hg** involving (i) intermolecular C...F contacts (pink dotted lines), which propagate along the *b*- and *c*-axes and (ii) intermolecular C...O interactions (green dotted lines), which propagate along the *b*-axis.

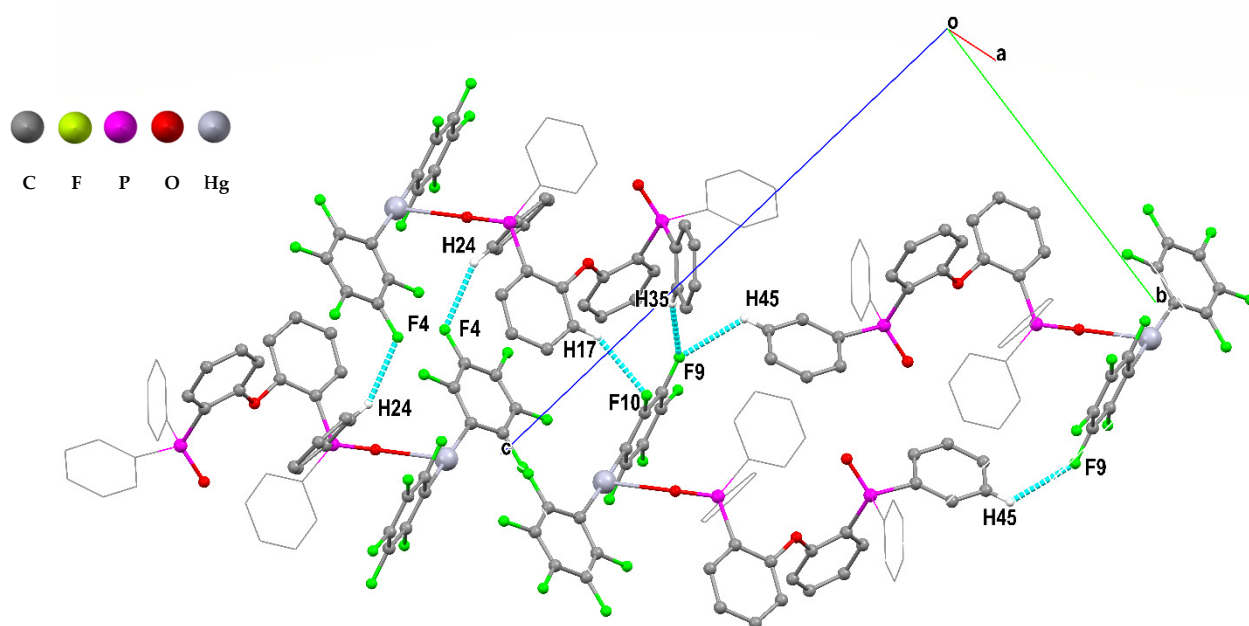

**Figure S23.** Packing diagrams showing the two-dimensional arrangement of complex **3Hg** involving intermolecular H...F interactions (green blue dotted lines), which propagate along the *a*-, *b*- and *c*-axes.

**Table S5.** Intramolecular contacts in complexes **1Hg**, **2Hg** and **3Hg**

| Compound        | Distance (Å)  |               |               |
|-----------------|---------------|---------------|---------------|
|                 | 1Hg           | 2Hg           | 3Hg           |
| Hg- <i>o</i> -F | 3.138 – 3.262 | 3.177 – 3.242 | 3.097 – 3.299 |
| Hg- <i>o</i> -C | 3.001 – 3.064 | 3.026 – 3.058 | 2.987 – 3.090 |
